# Supplementary material
Source: HighWire-hosted journal article supplement (https://erj.ersjournals.com/content/55/6/2000038)
Supplement: inline-supplementary-material-1 [file inline-supplementary-material-1.pdf]

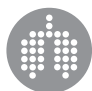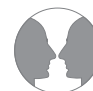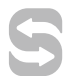

SHAREABLE PDF

# Increased reporting of fatal pneumonitis associated with immune checkpoint inhibitors: a WHO pharmacovigilance database analysis

Melissa Y.Y. Moey <sup>1</sup>, Paul Gougis <sup>2</sup>, Vincent Goldschmidt <sup>2</sup>, Douglas B. Johnson<sup>3</sup>, Bénédicte Lebrun-Vignes<sup>2,3</sup>, Javid Moslehi<sup>4</sup>, Jacques Cadranel<sup>5</sup> and Joe-Elie Salem<sup>2,4</sup>

**Affiliations:** <sup>1</sup>Dept of Cardiovascular Sciences, Vidant Medical Center/East Carolina University, Greenville, NC, USA. <sup>2</sup>Dept of Pharmacology, INSERM CIC-1901, UNICO-GRECO Cardio-oncology Program, CLIP2 Galilée, APHP.Sorbonne Université, Hôpital Pitié-Salpêtrière, Paris, France. <sup>3</sup>Pitié and Saint Antoine Pharmacovigilance Centres, APHP, Sorbonne Université, UPEC EA EpiDermE 7379, Paris, France. <sup>4</sup>Dept of Medicine, Vanderbilt University Medical Center, Nashville, TN, USA. <sup>5</sup>Chest Dept, Thoracic Oncology Expert Center, Rare Pulmonary Diseases Constitutive Center, GRC #4, Therascan Sorbonne Université and APHP, Sorbonne Université, Hôpital Tenon, Paris, France.

**Correspondence:** Jacques Cadranel, Service de Pneumologie, Hôpital Tenon, 4 rue de la Chine 75970, Paris, France. E-mail: jacques.cadranel@daphp.fr

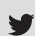

@ERSpublications

**There was an increased reporting of immune checkpoint inhibitor (ICI)-pneumonitis over the past few years with earlier time to onset of fatal ICI-pneumonitis, which was associated with more respiratory failure and tumour progression** <http://bit.ly/32GW51a>

**Cite this article as:** Moey MYY, Gougis P, Goldschmidt V, *et al.* Increased reporting of fatal pneumonitis associated with immune checkpoint inhibitors: a WHO pharmacovigilance database analysis. *Eur Respir J* 2020; 55: 2000038 [<https://doi.org/10.1183/13993003.00038-2020>].

This single-page version can be shared freely online.

## To the Editor:

The discovery of immune checkpoint inhibitors (ICIs), which include anti-programmed cell death protein-1 (PD-1), its ligand (PD-L1) and anti-cytotoxic T cell lymphocyte-associated protein-4 (CTLA-4), has transformed the field of oncology, with indications continuing to increase. For example, anti-PD1 and anti-CTLA-4 ICIs, which include nivolumab, pembrolizumab and ipilimumab, are US Food and Drug Administration/European Medicines Agency approved for a variety of cancers, such as melanoma and non-small cell lung carcinoma (NSCLC) [1]. Considered the Achilles' heel of ICIs, however, are immune-related adverse events (irAEs) (10–60% high grade) that represent an inflammatory response that can affect multiple organ systems, which can be fatal (0.3–1.3%) [2].
